# Supplementary material for: On the Use of Graphene Nanosheets for Drug Delivery: A Case Study of Cisplatin and Some of Its Analogs
Source: MDPI journal article supplement (doi:10.3390/pharmaceutics15061640), 2023-06-01
Supplement: s1 [file s1]

## Supplementary Information

# On the Use of Graphene Nanosheets for the Drug Delivery: A Case Study of Cisplatin and some of its Analogs

Mahmoud A. A. Ibrahim<sup>1,2,\*</sup>, Manar H. A. Hamad<sup>1</sup>, Amna H. M. Mahmoud<sup>1</sup>, Gamal A. H. Mekhemer<sup>1</sup>, Shaban R. M. Sayed<sup>3</sup>, Mohamed K. Abd El-Rahman<sup>4</sup>, Peter A. Sidhom<sup>5</sup>, Eslam Dabbish<sup>6</sup>, and Tamer Shoeib<sup>6,\*</sup>

<sup>1</sup> Computational Chemistry Laboratory, Chemistry Department, Faculty of Science, Minia University, Minia 61519, Egypt; m.ibrahim@compchem.net; m.hamad@compchem.net; a.mahmoud@compchem.net; gmekhemer@mu.edu.eg.

<sup>2</sup> School of Health Sciences, University of KwaZulu-Natal, Westville, Durban 4000, South Africa

<sup>3</sup> Department of Botany and Microbiology, College of Science, King Saud University, P.O. Box 2455, Riyadh 11451, Saudi Arabia; shmohamed@ksu.edu.sa

<sup>4</sup> Department of Chemistry and Chemical Biology, Harvard University, 12 Oxford Street, Cambridge, MA 02138, USA; k Abdelazim@gmwhgroup.harvard.edu

<sup>5</sup> Department of Pharmaceutical Chemistry, Faculty of Pharmacy, Tanta University, Tanta 31527, Egypt; peter.ayoub@pharm.tanta.edu.eg.

<sup>6</sup> Department of Chemistry, The American University in Cairo, New Cairo 11835, Egypt; emoustafa@aucegypt.edu; t.shoeib@aucegypt.edu

\* Correspondence: m.ibrahim@compchem.net (M.A.A.I.) and t.shoeib@aucegypt.edu (T.S.).

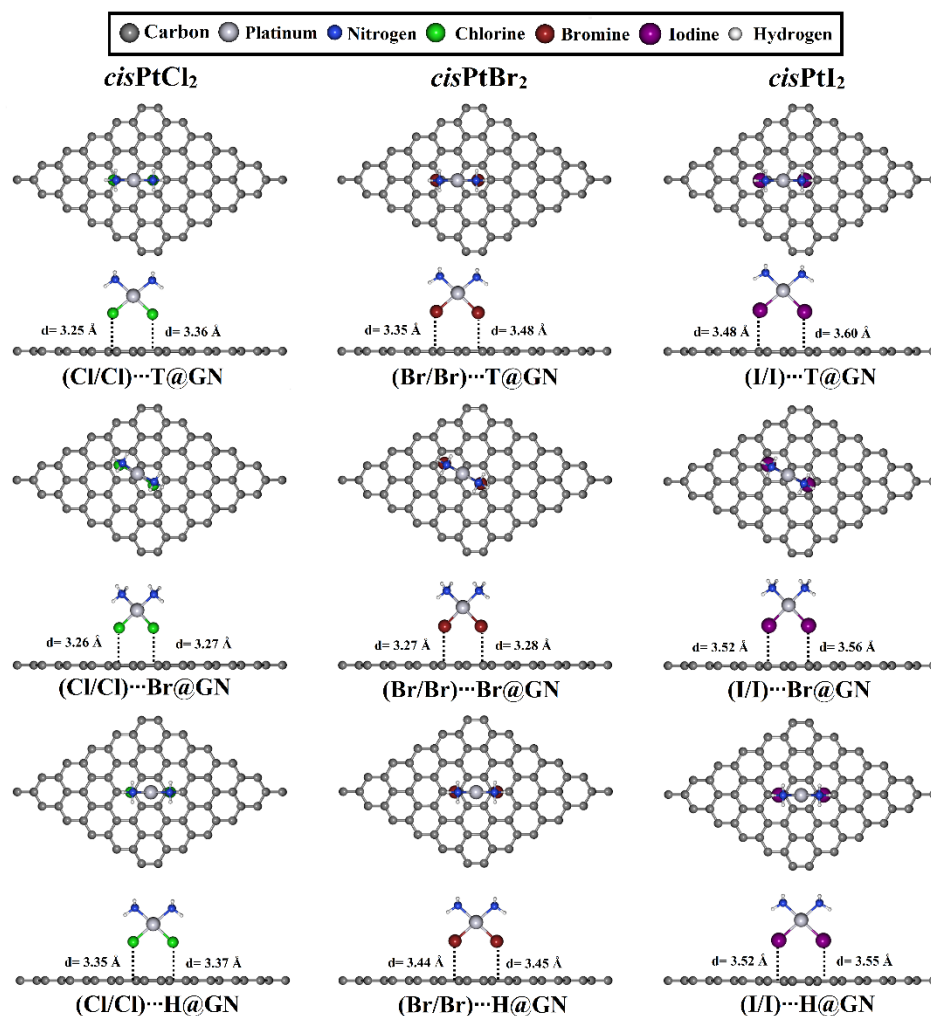

**Figure S1.** Top and side views of all the relaxed structures for *cis*PtX<sub>2</sub>...GN complexes (where X = Cl, Br, and I) in perpendicular and parallel configurations at all adsorption sites. The equilibrium distances (d) are presented in Å.

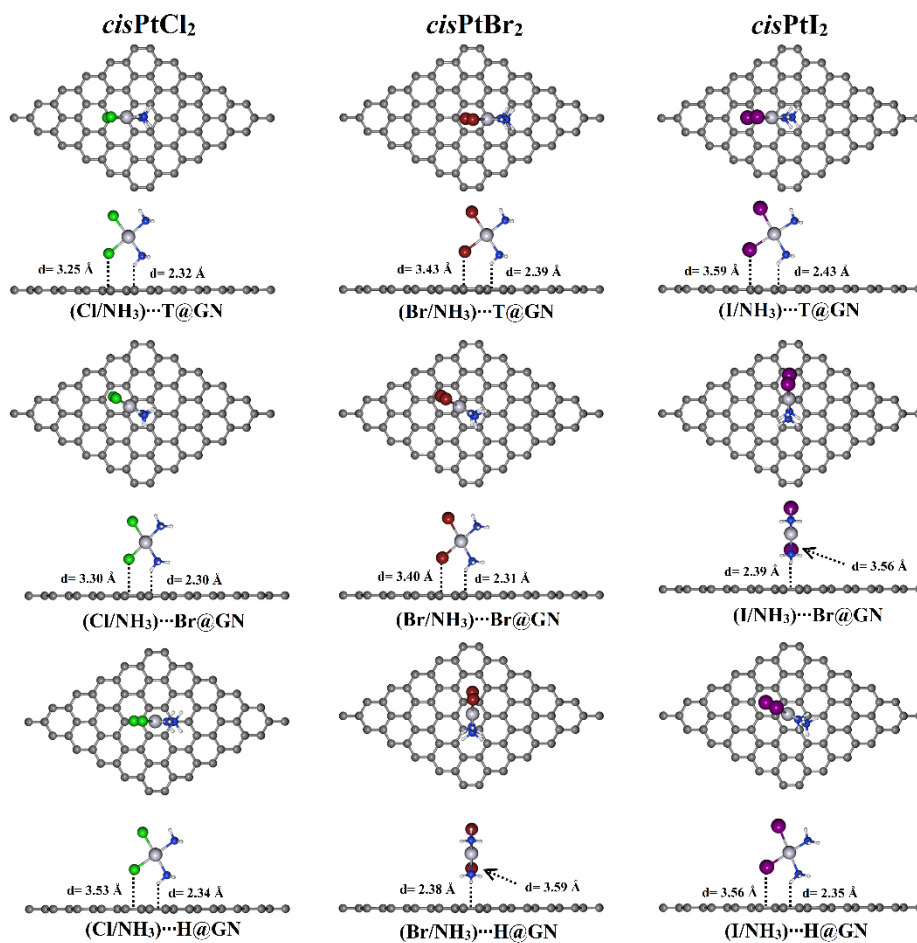

Figure S1. Continued.

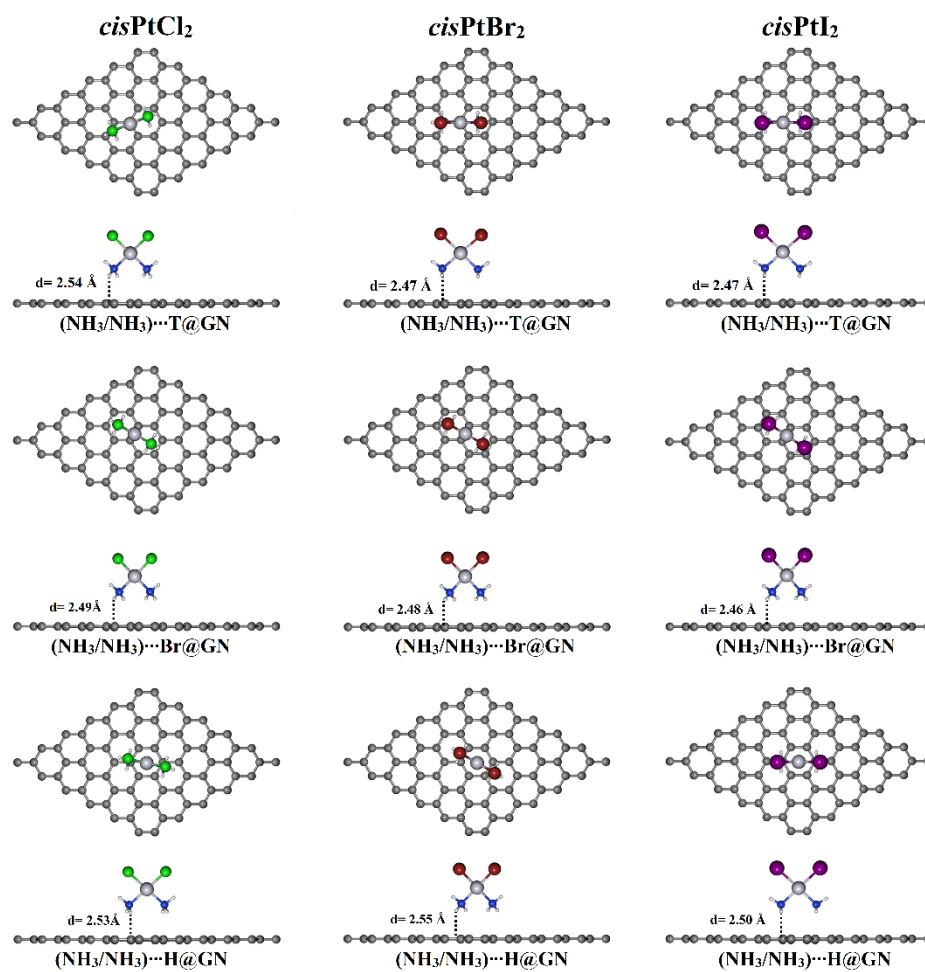**Figure S1.** Continued.

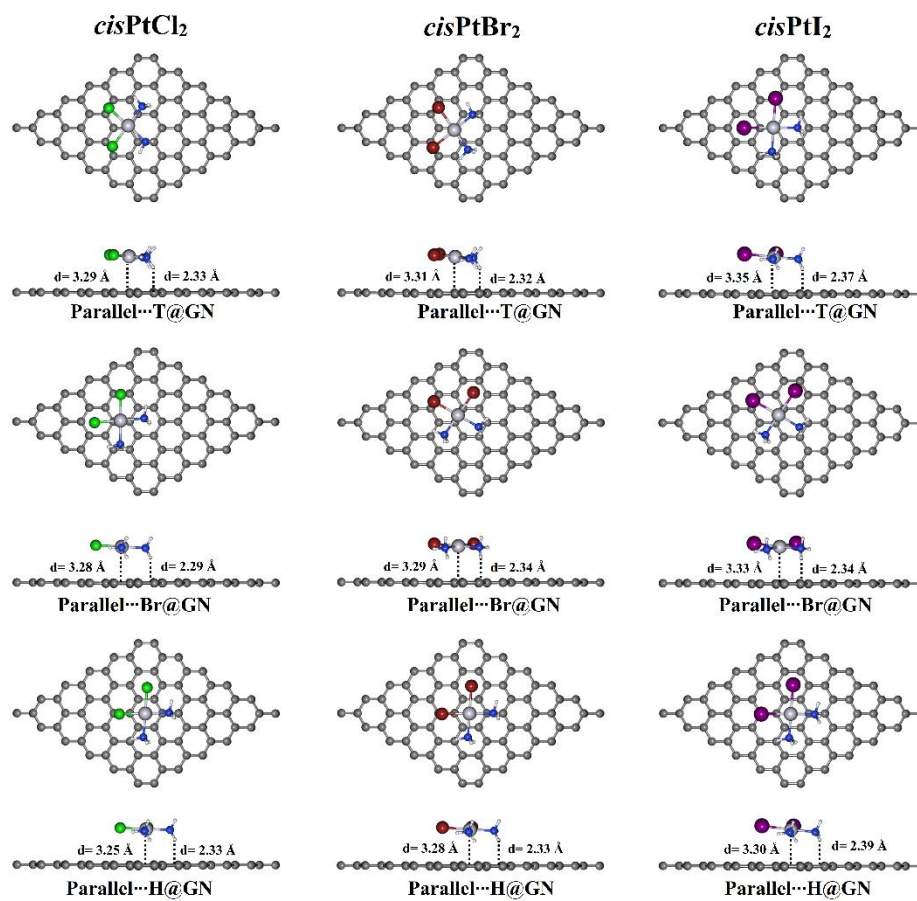

Figure S1. Continued.

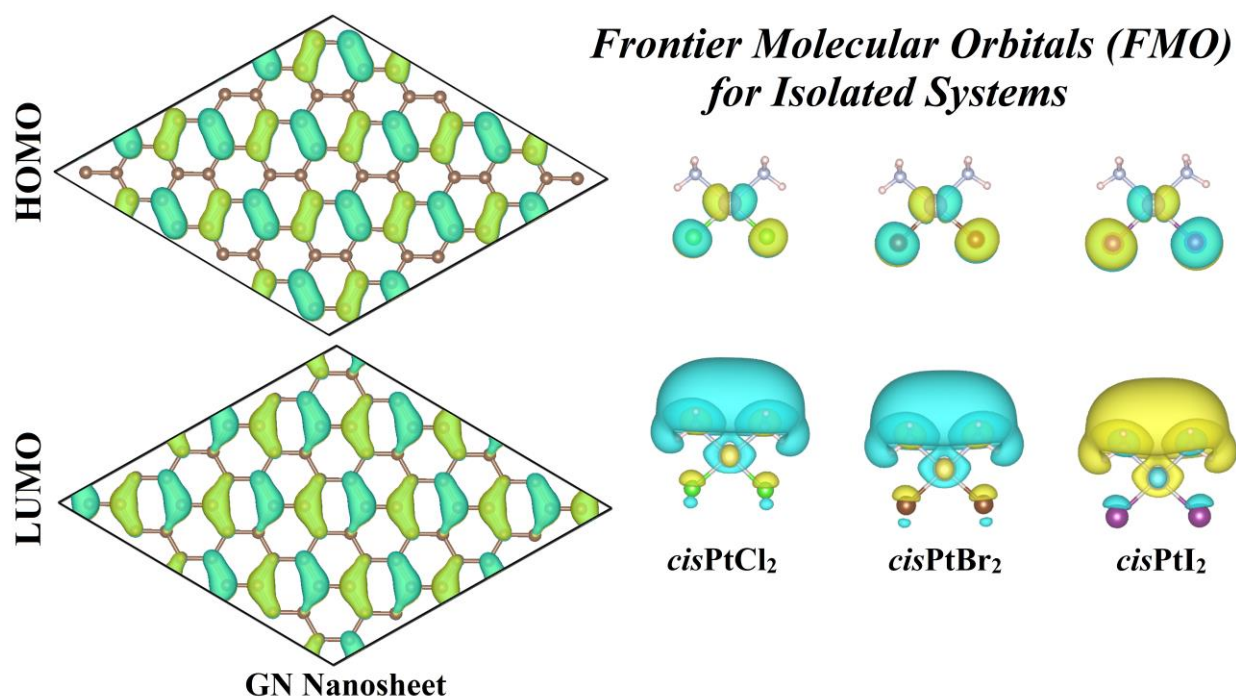

**Figure S2.** Distributions of HOMO and LUMO for the GN nanosheet and *cisPtX<sub>2</sub>* molecules before the adsorption process. Pale brown, silver, pink, gray, green, dark brown, and violet balls refer to carbon, platinum, hydrogen, nitrogen, chloride, bromide, and iodide atoms, respectively.

## *Frontier Molecular Orbitals (FMO)*

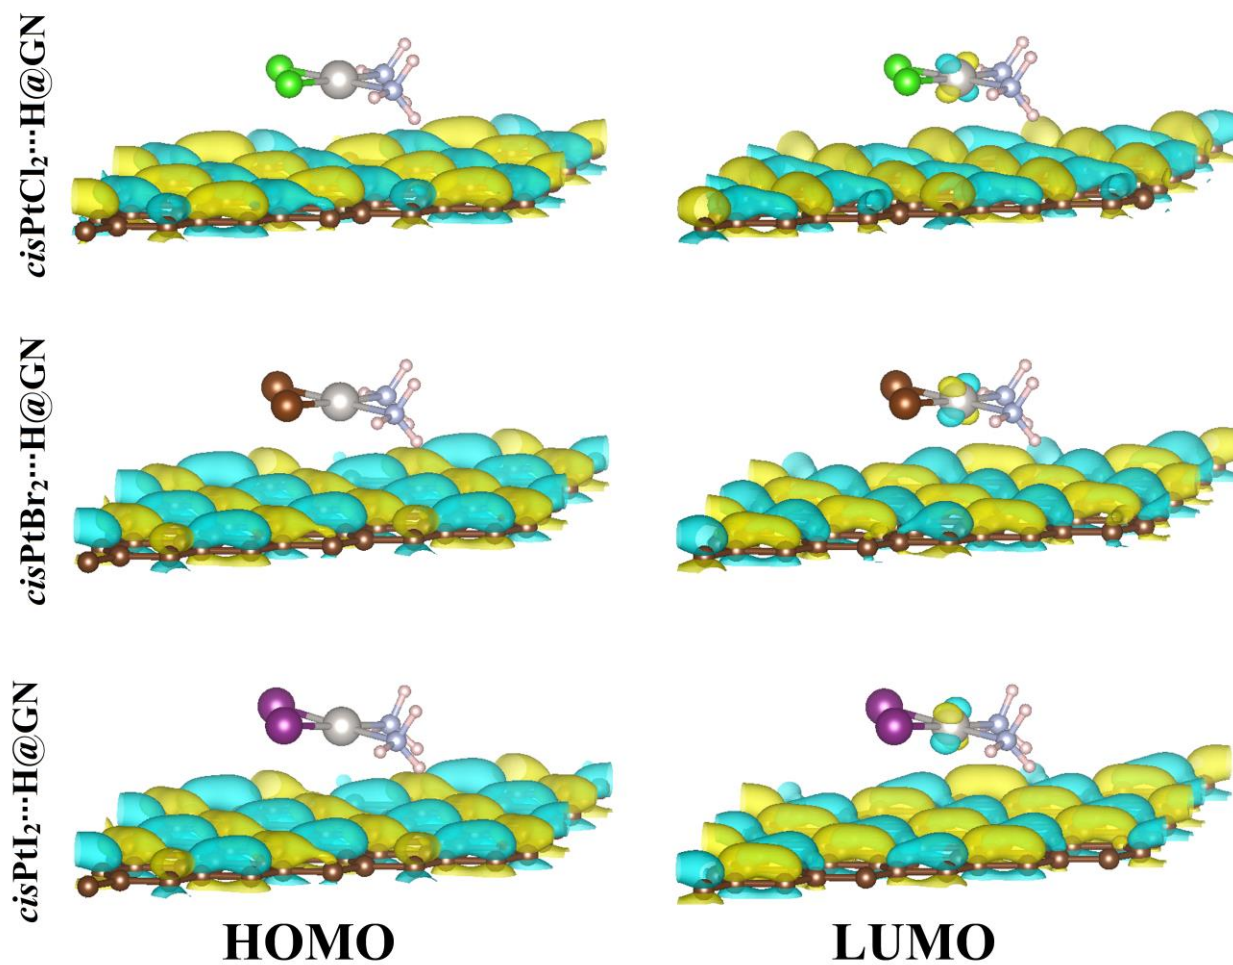

**Figure S3.** Distributions of HOMO and LUMO for the most favorable relaxed  $cisPtX_2 \cdots GN$  complexes within the parallel configuration. Pale brown, silver, pink, gray, green, dark brown, and violet balls refer to carbon, platinum, hydrogen, nitrogen, chloride, bromide, and iodide atoms, respectively.

## Pristine Graphene (GN)

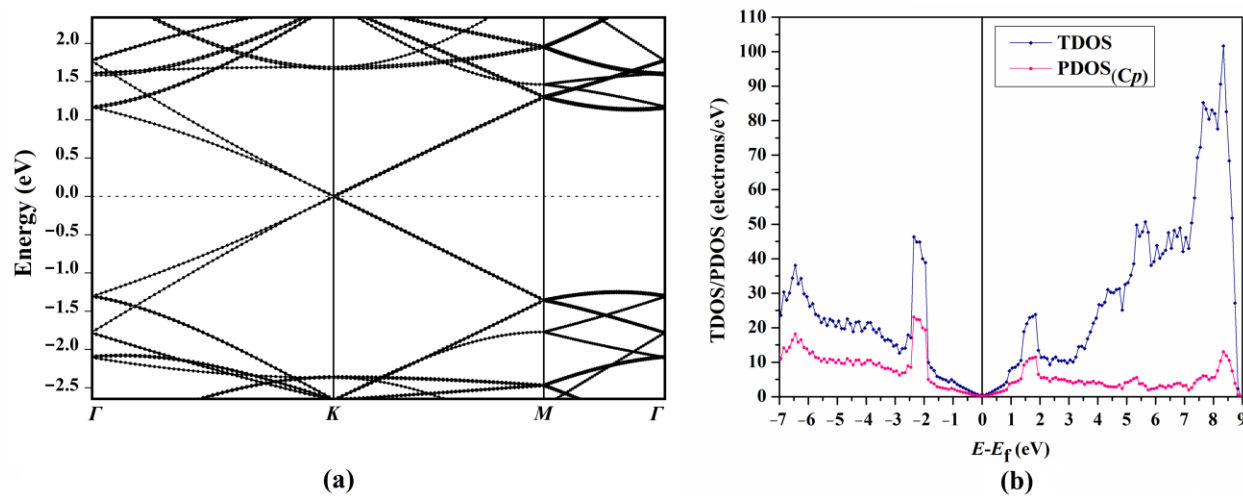

**Figure S4.** (a) Band structure of the pure GN nanosheet along high symmetry points of Brillouin zone, (b) Total and projected density of state (TDOS/PDOS) for the pure GN nanosheet, the contribution of  $p$ -orbital for carbon atom displayed by  $C_p$ . the Fermi level is located at zero energy.
